# Supplementary material for: Turn-on fluorescent aptasensing for the determination of serotonin via target-induced knot displacement at corona
Source: Royal Society of Chemistry journal article supplement (doi:10.1039/d4cc00934g), 2024-01-01
Supplement: d4cc00934g1.pdf [file d4cc00934g1.pdf]

## Supporting Information

### **Turn-on Fluorescent Aptasensing for Determination of Serotonin via Target-Induced Knot Displacement at Corona**

**Hagir Omer M.A., Danyang Zhang, Wenshuai Zhou, Xiaolin Yang\*, Honglan Qi\***

Key Laboratory of Analytical Chemistry for Life Science of Shaanxi Province, School of Chemistry and Chemical Engineering, Shaanxi Normal University, Xi'an, 710062, P.R. China.

\*Corresponding author. E-mail: xlyang@snnu.edu.cn; honglanqi@snnu.edu.cn.

## 1. Experiment

### 1.1 Reagents and apparatus

Serotonin (5-HT), dopamine hydrochloride (DA) and L-ascorbic acid (AA) were purchased from Sigma-Aldrich (USA). Anti-5-HT aptamer-FAM sequence and six ss-DNAs (including ss-DNA-a-Dabcyl, ss-DNA-b-Dabcyl, ss-DNA-c-Dabcyl, ss-DNA-d-Dabcyl and ss-DNA-e-Dabcyl, random ss-DNA-Dabcyl) were synthesized by Sangon Biotechnology Inc. (China, Table S1). Norepinephrine (NE) and L-3,4-dihydroxyphenylalanine (L-DOPA) were obtained from Wokai Chemical Reagent Co., Ltd (China). 10 mM PBS (containing 0.0018 M NaH<sub>2</sub>PO<sub>4</sub>, 0.0082 M Na<sub>2</sub>HPO<sub>4</sub>, 0.10 M KCl, 0.1 M NaCl and 0.005 M MgCl<sub>2</sub>, pH 7.40) was used as DNA incubation solution. A Millipore Milli-Q water (18.2 MΩ·cm) was used in this work.

FluoroMax-4 (HORIBA, USA), an electrophoresis chamber (Shanghai Titan Scientific Co., Ltd., China), circular dichroism spectrometer (CD, Applied Photophysics Ltd., UK) were used.

**Table S1.** Oligonucleotide sequences used in the experiments

| Oligonucleotide       | sequence (5'→3')                                                                                   |
|-----------------------|----------------------------------------------------------------------------------------------------|
| Anti-5-HT aptamer-FAM | FAM-(CH <sub>2</sub> ) <sub>6</sub> -CGA CTG GTA GGC AGA TAG GGG AAG<br>CTG ATT CGA TGC GTG GGT CG |
| ss-DNA-a-Dabcyl       | GCC TAC CAG TCG -(CH <sub>2</sub> ) <sub>6</sub> -Dabcyl                                           |
| ss-DNA-b-Dabcyl       | CAG CTT CCC CTA -(CH <sub>2</sub> ) <sub>6</sub> -Dabcyl                                           |
| ss-DNA-c-Dabcyl       | TCA GCT TCC CCT -(CH <sub>2</sub> ) <sub>6</sub> -Dabcyl                                           |
| ss-DNA-d-Dabcyl       | CAG CTT CCC CTA TTT TTT TTT TTT TTT-(CH <sub>2</sub> ) <sub>6</sub> -<br>Dabcyl                    |
| ss-DNA-e-Dabcyl       | TCA GCT TCC CCT TTT TTT TTT TTT TTT-(CH <sub>2</sub> ) <sub>6</sub> -<br>Dabcyl                    |
| Random ss-DNA-Dabcyl  | ACT TTG TTT GGT-(CH <sub>2</sub> ) <sub>6</sub> -Dabcyl                                            |

### 1.2 Preparation of the FAM-ds-DNA-Dabcyl biocomplex

The biocomplexes was fabricated according to the reference.<sup>1</sup> Briefly, 6 μL anti-5-HT aptamer-FAM, 18 μL ss-DNA-Dabcyl and 1976 μL 1× PBS were added into a 2 mL tube with a typically final concentration 30 nM of anti-5-HT aptamer-FAM and 90 nM of ss-DNA-Dabcyl. The mixture complex was incubated for 1 h at 37 °C using a

mixed incubation instrument. After that, the FAM-ds-DNA-Dabcyl biocomplex was obtained without others handle step.

### 1.3 Fluorescence measurement for 5-HT detection

The obtained FAM-ds-DNA-Dabcyl biocomplex was incubated with different concentrations of 5-HT for 30 min at 37 °C. The fluorescence emission was recorded on the FluoroMax-4 (HORIBA, USA) with an excitation wavelength of 465 nm and slit of 5 nm. The concentration of 5-HT was quantified by the increased FL intensity at 515 nm,  $\Delta I = I - I_0$ , where  $I_0$  and  $I$  is the FL intensity in the absence and presence of 5-HT, respectively.

### 1.4 Calculation for the quenching constant $K_{SV}$

The quenching constant  $K_{SV}$  was calculated according to the Stern-Volmer equation (eq. S1),

$$I_0/I = 1 + K_{SV}C \quad (S1)$$

where  $I_0$  and  $I$  are the FL intensities before and after the addition of the ss-DNA-Dabcyl,  $K_{SV}$  is the quenching constant, and  $C$  is the ss-DNA-Dabcyl concentration.

### 1.5 Determination of dissociation constants ( $K_d$ )

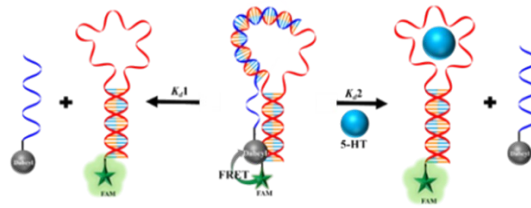

$$K_{d1} = \frac{[anti - 5 - HT \text{ aptamer} - FAM][ss - DNA - Dabcyl]}{[FAM - ds - DNA - Dabcyl \text{ biocomplex}]} \quad (S2)$$

$$K_{d2} = \frac{[ss - DNA - Dabcyl][5 - HT \bullet anti - 5 - HT \text{ aptamer} - FAM]}{[FAM - ds - DNA - Dabcyl \text{ biocomplex}][5 - HT]} \quad (S3)$$

$$K_d = \frac{K_{d1}}{K_{d2}} \quad (S4)$$

The  $K_d$  was calculated by the equation S4 using the obtained  $K_{d1}$  and  $K_{d2}$ , in which  $K_{d1}$  is dissociation constant of FAM-ds-DNA-Dabcyl biocomplex to the ss-DNA-Dabcyl and anti-5-HT aptamer-FAM (eq. S2), while  $K_{d2}$  is dissociation constant between the FAM-ds-DNA-Dabcyl biocomplex and 5-HT (eq. S3). Namely,  $K_{d1}$  was calculated using the equation S2 by fluorescence quenching method. Upon target 5-HT binding, the anti-5-HT aptamers will dissociate from the formed FAM-ds-DNA-Dabcyl

biocomplex. The  $K_{d2}$  was calculated using the equation S3 in the presence of increasing concentrations of 5-HT.

### 1.6 Schematic diagram for the terminal hybridized tactic

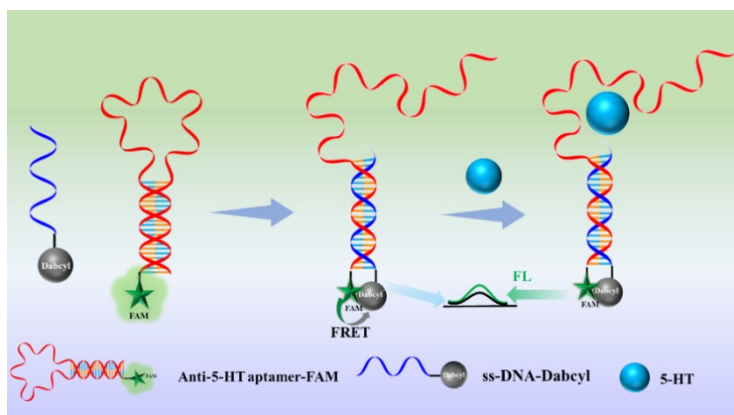

**Scheme S1** Schematic diagram of the proposed turn-on fluorescent aptasensing for determination of serotonin via terminal hybridized approach.

## 2. Results:

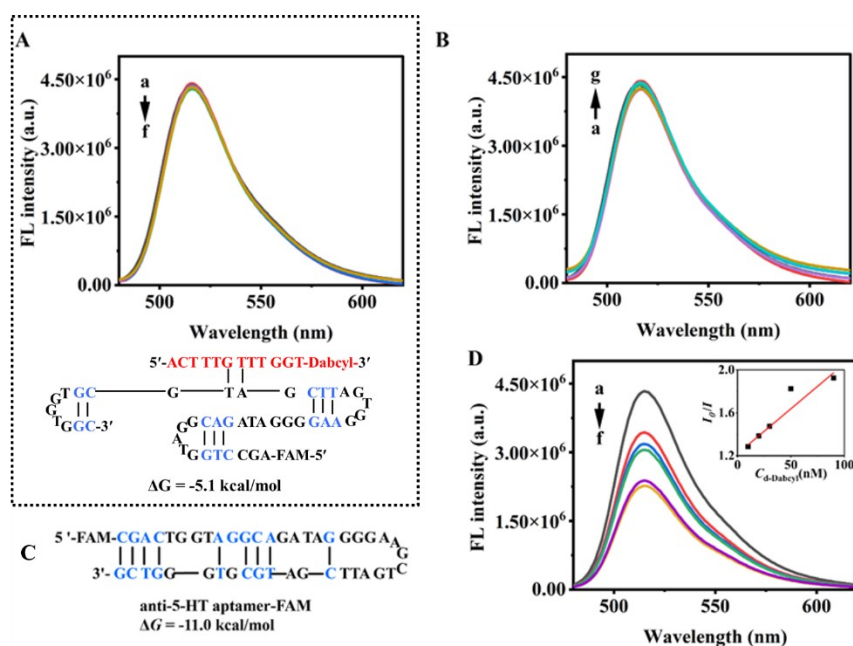

**Fig. S1.** (A) FL spectra of 30 nM anti-5-HT aptamer-FAM to random ss-DNA-Dabcyl concentration (0, 10, 20, 30, 50 and 90 nM, respectively). Inset, anti-5-HT aptamer-FAM hybridized with random ss-DNA-Dabcyl. (B) FL spectra of anti-5-HT aptamer-FAM reacted with different concentration of 5-HT (a-g, 0, 1, 10, 100, 500 nM, 1.0  $\mu\text{M}$  and 10  $\mu\text{M}$ ). (C) Anti-5-HT aptamer-FAM self-hybridization. (D) FL spectra of 30 nM anti-5-HT aptamer-FAM to ss-DNA-d-Dabcyl concentration (0, 10, 20, 30, 50 and 90 nM, respectively). Inset, the relationship between  $I_0/I$  and ss-DNA-d-Dabcyl concentration.

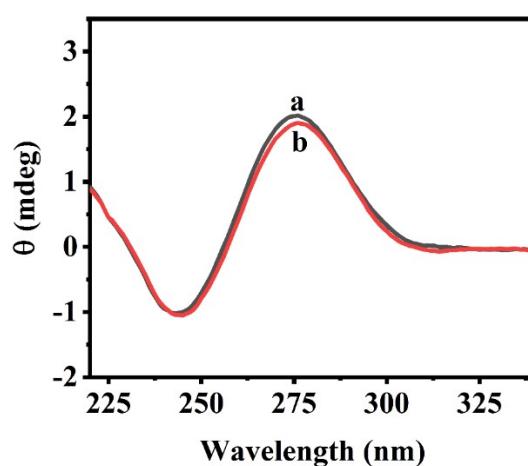

**Fig. S2.** CD spectra of 3  $\mu\text{M}$  FAM-ds-DNA-a-Dabcyl in the (a) absence and (b) presence of 30  $\mu\text{M}$  5-HT in 10 mM PBS (pH 7.40).

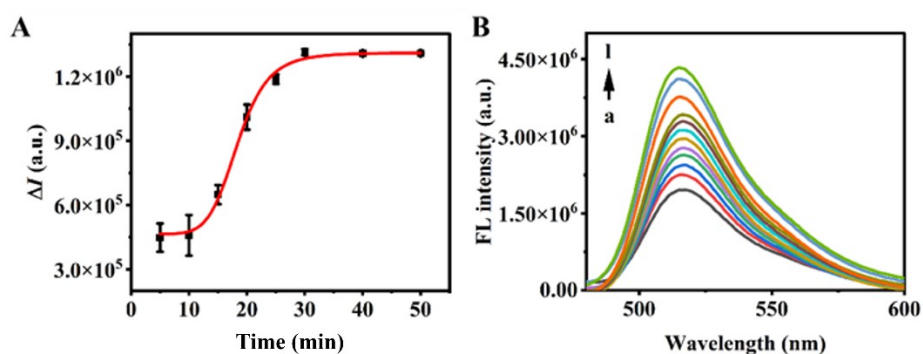

**Fig. S3.** (A) The relationship between FL intensity and incubation time with 100 nM 5-HT for FAM-ds-DNA-d-Dabcyl knot biocomplex. (B) FL spectra of FAM-ds-DNA-d-Dabcyl reacted with different concentrations of 5-HT (a-l, 0, 0.5, 1, 5, 10, 30, 80, 50, 100, 500 nM, 1.0  $\mu$ M and 10  $\mu$ M).

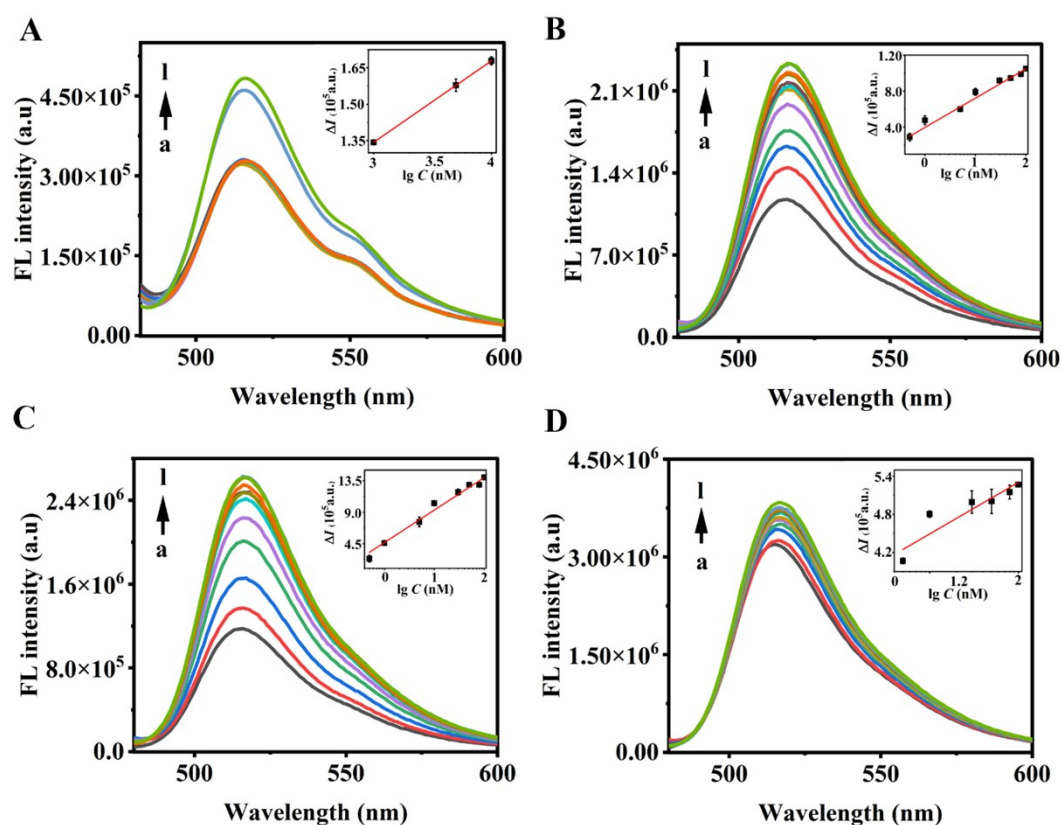

**Fig. S4.** FL spectra of FAM-ds-DNA-Dabcyl reacted with different concentrations of 5-HT (a-l, 0, 0.5, 1, 5, 10, 30, 50, 80, 100, 500 nM, 1.0  $\mu$ M and 10  $\mu$ M), (A) FAM-ds-DNA-a-Dabcyl (B) FAM-ds-DNA-b-Dabcyl (C) FAM-ds-DNA-c-Dabcyl (D) FAM-ds-DNA-e-Dabcyl (inset: calibration curve).

**Table S2.** Comparison of analytical performance of five FAM-ds-DNA-Dabcyl bio-complex for 5-HT

| <b>ds-DNA</b>       | <b>Linear range</b> | <b>Detection limit</b> |
|---------------------|---------------------|------------------------|
| FAM-ds-DNA-a-Dabcyl | 1-10 $\mu$ M        | 3 $\mu$ M              |
| FAM-ds-DNA-b-Dabcyl | 0.5-100 nM          | 0.2 nM                 |
| FAM-ds-DNA-c-Dabcyl | 0.5-100 nM          | 0.5 nM                 |
| FAM-ds-DNA-d-Dabcyl | 0.5-100 nM          | 0.1 nM                 |
| FAM-ds-DNA-e-Dabcyl | 5-100 nM            | 45 nM                  |

**Table S3.** Comparison of the reported methods for determination of 5-HT

| <b>Analytical method</b>               | <b>Sensing mechanism</b> | <b>Linear range</b> | <b>Detection limit</b> | <b>References</b> |
|----------------------------------------|--------------------------|---------------------|------------------------|-------------------|
| Electrochemistry                       | 5-HT-apt-Fc              | 1-100 $\mu$ M       | 0.3 $\mu$ M            | (1)               |
| Electrochemistry                       | Aptamer-MB               | 1pM-10 nM           | 0.017 fM               | (2)               |
| Optical images based on liquid crystal | CTAB/aptamer             | 1- 1000 nM          | 1.68 nM                | (3)               |
|                                        | DNA aptamer /SWCNT       | 0.1-1 $\mu$ M       | -                      | (4)               |
| Fluorescence                           |                          |                     |                        |                   |
| Fluorescence                           | ssDNA-SWCNT              | -                   | 100 $\mu$ M            | (5)               |
| Fluorescence                           | ssDNA-SWCNT              | 0.1-50 $\mu$ M      | -                      | (6)               |
| Fluorescence                           | FAM-ds-DNA-d-Dabcyl      | 0.5-100 nM          | 0.1 nM                 | This work         |

**MB:** methylene blue, **Fc:** ferrocene, **CTAB:** cationic surfactant hexadecyl trimethyl-ammonium bromide, **SWCNT:** single-walled carbon nanotube.

**Table S4.** The controls levels of neurotransmitters in artificial cerebrospinal fluid

| Group  | aCSF(nM)        | References |
|--------|-----------------|------------|
| NE     | $0.98 \pm 0.09$ | (7)        |
| DA     | $3.30 \pm 3.40$ | (7)        |
| L-DOPA | 3.81            | (8)        |
| 5-HT   | $3.30 \pm 3.40$ | (9)        |

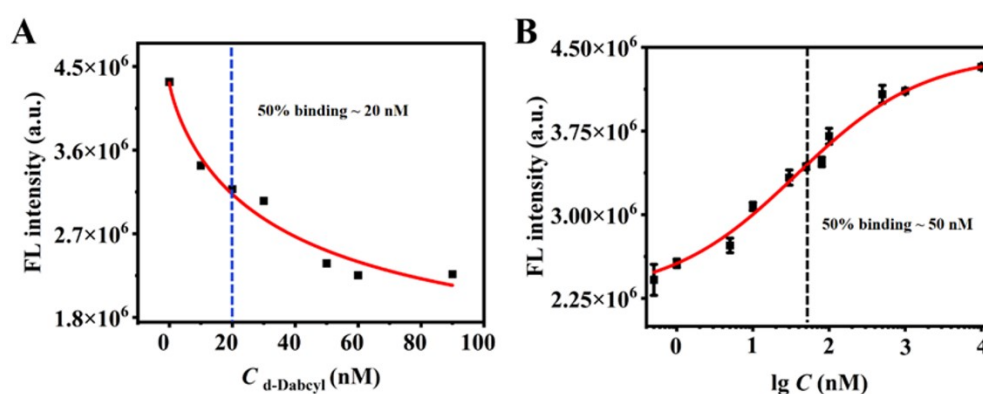

**Fig. S5.** Determination of binding constants ( $K_d$ ) for anti-5-HT aptamer-FAM to 5-HT. (A) The relationship between FL intensity of 30 nM anti-5-HT aptamer-FAM reacted with different concentrations of ss-DNA-Dabcyl concentration (0, 10, 20, 30, 50, 60 and 90 nM, respectively). (B) The relationship between FL intensity of FAM-ds-DNA-d-Dabcyl reacted with different concentrations of 5-HT (0, 0.1, 5, 10, 30, 80, 50, 100, 500 nM, 1.0  $\mu\text{M}$  and 10  $\mu\text{M}$ ). For example, 50% binding between anti-5-HT aptamer-FAM and ss-DNA-d-Dabcyl means the FL intensity of anti-5-HT aptamer-FAM of decrease to 50% of its original FL intensity.

**Table S5.** Comparison of anti-5-HT aptamer dissociation constants ( $K_d$ ) value reported by different methods.

| Method                   | $K_d$         | References |
|--------------------------|---------------|------------|
| Field-effect transistors | 30 nM         | (10)       |
| Fluorescence             | 127 nM        | (11)       |
| Fluorescence             | 6.3 $\mu$ M   | (6)        |
| Fluorescence             | 0.307 $\mu$ M | (4)        |
| Fluorescence             | 2.3 nM        | This work  |

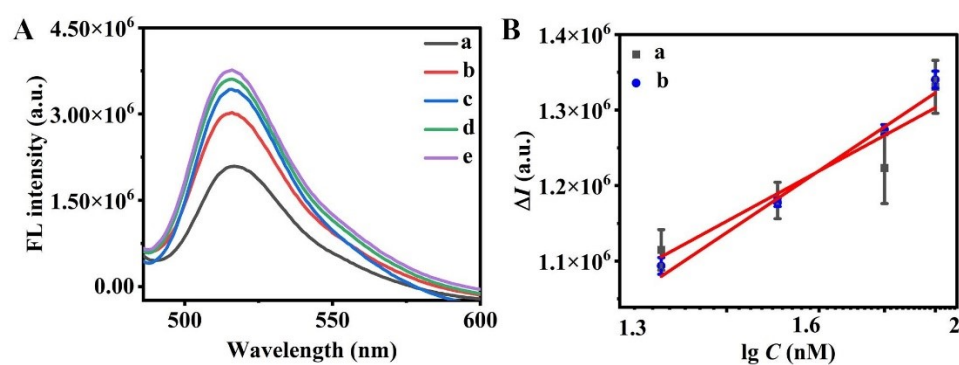

**Fig. S6.** (A) FL spectra of the FAM-ds-DNA-d-Dabcyl knot biocomplex in aCSF containing different concentrations of 5-HT (a-e, blank, 30, 50, 80 and 100 nM), (B) The relationship between the increased FL intensity and 5-HT concentrations in (a) 10 mM PB (pH 7.40) and in (b) an aCSF.

**Table S6.** The recovery (%) of 5-HT in artificial cerebrospinal fluid

| Sample | Added (nM) | Found (nM)      | Recovery (%)    |
|--------|------------|-----------------|-----------------|
| 1      | 30         | 31.6 $\pm$ 2.3  | 105.3 $\pm$ 7.6 |
| 2      | 50         | 49 $\pm$ 1.0    | 98 $\pm$ 2.0    |
| 3      | 80         | 79.4 $\pm$ 1.9  | 99.2 $\pm$ 2.3  |
| 4      | 100        | 100.1 $\pm$ 2.4 | 100.1 $\pm$ 2.4 |

## References

1. X. Geng, M. Zhang, H. Long, Z. Hu, B. Zhao, L. Feng and J. Du, *Anal. Chim. Acta*, 2021, **1145**, 124-131.
2. R. Li, X. Li, L. Su, H. Qi, X. Yue and H. Qi, *Electroanal.*, 2021, **34**, 1048-1053.
3. J. J. Ryu and C. H. Jang, *Biotechnol. Appl. Bioc.*, 2023, **70**, 1972-1982.
4. M. Dinarvand, E. Neubert, D. Meyer, G. Selvaggio, F.A. Mann, L. Erpenbeck, S. Kruss, *Nano Lett.*, 2019, **19**, 6604-6611.
5. P. Kelich, S. Jeong, N. Navarro, J. Adams, X. Sun, H. Zhao, M.P. Landry and L. Vukovic, *ACS Nano*, 2022, **16**, 736-745.
6. S. Jeong, D. Yang, A.G. Beyene, J.T.D. O'Donnell, A.M.M. Gest, N. Navarro, X. Sun and M.P. Landry, *Sci. Adv.*, 2019, **5**, 1-12.
7. D.S. Goldstein, C. Holmes and Y. Sharabi, *Brain*, 2012, **135**, 1900-1913.
8. D.S. Goldstein, S.H. Hahn, C. Holmes, C. Tiffet, J. Harvey, S. Milstein and S. Kaufman, *J. Neurochem.*, 2002, **64**, 2810-2813.
9. A.M.K. Kumar, M. Kumar, K. Deepika, J. B. Fernandez and C. A. Eisdorfer, *Life Sci.*, 1990, **47**, 1751-1759.
10. N. Nakatsuka, K.A. Yang, J.M. Abendroth, K.M. Cheung, X. Xu, H. Yang, C. Zhao, B. Zhu, Y.S. Rim, Y. Yang, P.S. Weiss, M.N. Stojanović and A.M. Andrews, *Science*, 2018, **362**, 319-324.
11. M. Kubitschke, M. Müller, L. Wallhorn, M. Pulin, M. Mittag, S. Pollok, T. Ziebarth, S. Bremshey, J. Gerdey, K.C. Claussen, K. Renken, J. Groß, P. Gneiß, N. Meyer, J.S. Wiegert, A. Reiner, M. Fuhrmann and O.A. Maseck, *Nat. Commun.*, 2022, **13**, 7525.
